# Supplementary material for: Proteins of generalist and specialist pathogens differ in their amino acid composition
Source: Life Sci Alliance. 2018 Jul 17;1(4):e201800017. doi: 10.26508/lsa.201800017 (PMC6238412; doi:10.26508/lsa.201800017)
Supplement: Supplementary file 1 [file LSA-2018-00017_TableS1.xlsx]

## Sheet: Table S1
	Table S1. Amino acid composition and intrinsic disorder of extracellular and cytoplasmic proteins of generic and host-specific pathogens.
						AGDV						AGEV						AGVDE						AGEILPSTV						RExAA (RHMFW)						RPAA (ASTG)						Intrinsic disorder content (long stretches)						Intrinsic disorder content (short stretches)
	Generalist Pathogen Name	Specialist Pathogen Name	Location	Generalist Protein Count	Specialist Protein Count	Generalist Mean	Specialist Mean	Generalist Median	Specialist Median	P-value	Q-value	Generalist Mean	Specialist Mean	Generalist Median	Specialist Median	P-value	Q-value	Generalist Mean	Specialist Mean	Generalist Median	Specialist Median	P-value	Q-value	Generalist Mean	Specialist Mean	Generalist Median	Specialist Median	P-value	Q-value	Generalist Mean	Specialist Mean	Generalist Median	Specialist Median	P-value	Q-value	Generalist Mean	Specialist Mean	Generalist Median	Specialist Median	P-value	Q-value	Generalist Mean	Specialist Mean	Generalist Median	Specialist Median	P-value	Q-value	Generalist Mean	Specialist Mean
	Legionella pneumophila	Legionella longbeachae	Secreted	43	45	0.269723	0.254957	0.268199	0.257329	0.118527	0.232822	0.268363	0.252474	0.268199	0.255319	0.101816	0.210837	0.31879	0.30143	0.317857	0.29908	0.0388*	0.0889	0.658144	0.646901	0.649254	0.644836	0.28155	0.586667	0.116834	0.11661	0.115942	0.114286	0.993374	0.9934	0.303977	0.308981	0.28655	0.301527	0.792592	0.876006	0.08294	0.106012	0.0339286	0.0283688	0.79541	0.942857	0.0756484	0.0958881
	Salmonella enterica typhimurium	Salmonella enterica typhi	Secreted	69	66	0.303937	0.308703	0.295455	0.305412	0.509076	0.69998	0.295409	0.294403	0.291925	0.292394	0.929847	0.953858	0.349644	0.349115	0.344828	0.347204	0.776471	0.907415	0.686746	0.694483	0.680769	0.696277	0.439801	0.691117	0.11184	0.11152	0.109155	0.111639	0.881027	0.9934	0.352558	0.359811	0.348837	0.351647	0.531931	0.777392	0.141761	0.151888	0.0888889	0.101746	0.675565	0.942857	0.110174	0.116844
	Vibrio vulnificus	Vibrio cholerae	Secreted	27	45	0.309614	0.298875	0.309091	0.296896	0.367336	0.54604	0.305003	0.294122	0.30504	0.294845	0.30878	0.530716	0.367094	0.352465	0.370667	0.352577	0.177247	0.324952	0.687237	0.667935	0.69084	0.672897	0.0103*	0.0334*	0.111892	0.121696	0.104623	0.120116	0.0686987	0.21755	0.335117	0.320548	0.343066	0.321839	0.16989	0.403512	0.209589	0.136539	0.157333	0.102622	0.0652154	0.189155	0.135585	0.0994518
	Mycobacterium bovis	Mycobacterium leprae	Secreted	70	17	0.515136	0.332285	0.508439	0.333333	5.24 × 10−6***	1.92 × 10−6***	0.493022	0.318626	0.484406	0.321101	8.7 × 10−6***	3.41 × 10−6***	0.535344	0.366765	0.531506	0.366972	5.24 × 10−6***	1.92 × 10−5***	0.797336	0.739121	0.822861	0.742248	0.0026**	0.0101*	0.0933973	0.114587	0.0844068	0.108262	0.0588391	0.21755	0.540388	0.384208	0.544706	0.386598	0.0011**	0.0035**	0.40777	0.243275	0.343194	0.181818	0.0222834	0.0765992	0.232817	0.193069
	Bartonella henselae	Bartonella quintana	Secreted	6	3	0.266642	0.265812	0.251363	0.278571	0.904762	0.938904	0.298069	0.302218	0.288404	0.32967	1	1	0.346629	0.346072	0.337471	0.381868	0.904762	0.921517	0.675589	0.679182	0.674377	0.671429	1	1	0.126964	0.159035	0.118721	0.131868	0.243305	0.577838	0.305081	0.306288	0.301833	0.314286	0.904762	0.9048	0.122889	0.130199	0.10805	0.178571	0.904762	0.95696	0.0942036	0.16337
	Borrelia burgdoferi	Borrelia recurrentis	Secreted	6	7	0.236312	0.220418	0.227635	0.216312	0.5338	0.716073	0.245419	0.2444	0.236744	0.233728	0.835664	0.894844	0.300297	0.286791	0.298505	0.283892	0.628205	0.803518	0.644947	0.635132	0.654155	0.639053	0.628205	0.785256	0.114186	0.116229	0.120332	0.119048	0.886248	0.9934	0.271	0.263059	0.265148	0.251479	0.628205	0.79572	0.0600348	0.0372562	0.05988	0.030303	0.429488	0.778238	0.0681572	0.0508721
	Chlamydia trachomatis	Chlamydia pneumoniae	Secreted	21	16	0.293888	0.282151	0.293413	0.282177	0.554431	0.723324	0.303923	0.286529	0.302041	0.289435	0.386812	0.644687	0.346672	0.329023	0.353941	0.337619	0.370263	0.581842	0.717129	0.696864	0.724374	0.70046	0.0677361	0.177404	0.106546	0.109648	0.101796	0.111526	0.595867	0.9934	0.362582	0.37379	0.361404	0.359357	0.617087	0.79572	0.253969	0.282324	0.126524	0.0409647	0.634576	0.942857	0.210724	0.226547
	Rickettssia ricketsii	Rickettsia Prowazekki	Secreted	6	4	0.229632	0.211537	0.24708	0.226993	0.257143	0.428571	0.237002	0.219338	0.259705	0.232044	0.609524	0.817654	0.289971	0.269365	0.313311	0.289581	0.47619	0.689223	0.646077	0.62014	0.641063	0.625549	0.352381	0.605655	0.100792	0.121525	0.0969897	0.117199	0.199458	0.5415	0.27567	0.265056	0.279001	0.268754	0.352381	0.608691	0.104642	0.0227675	0.0355675	0.0133921	0.452793	0.778238	0.106945	0.0604702
	Citrobacter freundii	Citrobacter rodentium	Secreted	47	55	0.320147	0.329067	0.320132	0.33	0.323702	0.494545	0.299956	0.306752	0.296443	0.306878	0.214235	0.392764	0.35574	0.366666	0.359338	0.368421	0.15273	0.300005	0.701226	0.709462	0.694616	0.715134	0.188231	0.450117	0.10764	0.107198	0.103041	0.0965909	0.848263	0.9934	0.373494	0.376012	0.371158	0.367893	0.8299	0.876006	0.142288	0.175848	0.11236	0.108434	0.981242	0.994042	0.0992983	0.138597
	Salmonella enterica enteritidis	Salmonella enterica gallinarum	Secreted	59	60	0.304576	0.303479	0.298013	0.297282	0.767991	0.866877	0.295277	0.294869	0.291892	0.289247	0.765965	0.877668	0.348257	0.347956	0.342857	0.342269	0.852414	0.91927	0.688034	0.683525	0.691971	0.678649	0.499651	0.74517	0.111888	0.114274	0.10585	0.108968	0.659081	0.9934	0.355538	0.351666	0.356467	0.348513	0.468122	0.741158	0.157689	0.164446	0.1	0.111586	0.839872	0.942857	0.124466	0.130728
	Streptococcus dysgalactiae	Streptococcus pyogenes	Secreted	7	14	0.277819	0.23762	0.266575	0.222507	0.0556244	0.127472	0.273322	0.225237	0.26105	0.210252	0.0793258	0.174517	0.334746	0.286885	0.314917	0.266667	0.0480*	0.105526	0.643179	0.606634	0.642265	0.602575	0.0666839	0.177404	0.123017	0.122637	0.121837	0.125972	0.971018	0.9934	0.291518	0.263066	0.291457	0.252657	0.254524	0.48355	0.0617813	0.0556123	0.0722101	0.00606601	0.227095	0.543052	0.0534107	0.0786759
	Bacillus anthracis	Bacillus cereus	Secreted	59	54	0.253035	0.260891	0.2625	0.288819	0.310326	0.487656	0.261673	0.266653	0.264151	0.270554	0.73667	0.867334	0.314845	0.3219	0.330097	0.336349	0.512288	0.704396	0.609872	0.604654	0.621053	0.614455	0.717253	0.837453	0.118136	0.130387	0.113636	0.120948	0.307591	0.649378	0.276343	0.270913	0.283951	0.281634	0.712966	0.846688	0.23419	0.17429	0.0569948	0.0632698	0.937809	0.973198	0.228749	0.169016
	Mycobacterium avium	Mycobacterium intracellulare	Secreted	47	54	0.388819	0.384914	0.380567	0.387093	0.772308	0.866877	0.361957	0.363731	0.352423	0.369272	0.638511	0.83055	0.414916	0.411344	0.408907	0.415987	0.878248	0.921517	0.747089	0.753943	0.746032	0.761661	0.268563	0.586667	0.114342	0.113996	0.113233	0.109707	0.924062	0.9934	0.403381	0.414333	0.386085	0.407127	0.192297	0.405967	0.317884	0.273365	0.289796	0.205615	0.321868	0.708109	0.22871	0.200378
	Candida glabrata	Candida albicans	Secreted	163	51	0.27183	0.243012	0.265928	0.245146	0.0078**	0.0205*	0.261402	0.22957	0.255	0.222707	0.0008***	0.0025**	0.316845	0.291626	0.315	0.285714	0.0064**	0.0161*	0.697773	0.648162	0.694805	0.645714	0.0001***	0.0003***	0.106239	0.123979	0.103215	0.124731	0.0031**	0.0196*	0.353933	0.276144	0.352083	0.267016	8.8 × 10−6***	3.3 × 10−5***	0.228362	0.0681156	0.168548	0.0172414	4.80 × 10−7***	2.4 × 10−6***	0.162314	0.072151
	Babesia microti	Plasmodium falciparum	Secreted	95	380	0.223394	0.163517	0.216301	0.15999	1.3 × 10−26***	7.3 × 10−26***	0.215413	0.174959	0.215	0.167725	5.3 × 10−16***	2.5 × 10−15***	0.280172	0.236455	0.27451	0.230851	9.9 × 10−14***	4.6 × 10−13***	0.632886	0.545779	0.635945	0.542345	1.4 × 10−31***	4.6 × 10−31***	0.131603	0.129996	0.126888	0.125861	0.715908	0.9934	0.241863	0.166067	0.245117	0.160374	3.8 × 10−33***	2.41 × 10−32***	0.14942	0.148384	0.0307692	0.068715	0.375508	0.764924	0.134879	0.130007
	Ascaris suum	Wuchereria bancrofti	Secreted	1071	1406	0.241698	0.222065	0.238806	0.219275	1.9 × 10−25***	9.6 × 10−25***	0.247968	0.225165	0.244898	0.222222	3.5 × 10−31***	1.9 × 10−30***	0.298424	0.272528	0.298046	0.271837	1.2 × 10−31***	6.7 × 10−31***	0.633108	0.632626	0.631579	0.631177	0.541942	0.74517	0.168098	0.163104	0.166667	0.161045	0.0007***	0.0133*	0.26667	0.250034	0.262136	0.242661	6.7 × 10−19***	3.17 × 10−18***	0.120359	0.0828822	0.0188679	0	1.2 × 10−17***	1.1 × 10−16***	0.132691	0.120574
	All Generalist Prokaryotes	All Specialist Prokaryotes	Secreted	467	440	0.33345	0.302623	0.312994	0.302796	0.0057**	0.0174*	0.324664	0.29382	0.302041	0.292423	0.0013**	0.0038**	0.376462	0.347148	0.359855	0.347138	0.0016**	0.0045***	0.698209	0.680844	0.693878	0.682119	0.0030**	0.0110*	0.110181	0.11643	0.108911	0.11352	0.0323*	0.153425	0.37009	0.3429	0.353769	0.340148	0.0191*	0.0518429	0.213685	0.170057	0.126524	0.0900442	0.0073**	0.0285*	0.157353	0.138664
	All Generalist Eukaryotes	All Specialist Eukaryotes	Secreted	1329	1837	0.244085	0.210536	0.239631	0.206215	3.0 × 10−68***	2.38 × 10−67***	0.247289	0.214902	0.244	0.213415	3.5 × 10−66***	2.8 × 10−65***	0.299379	0.265596	0.298233	0.265432	6.5 × 10−63***	5.1 × 10−62***	0.641023	0.615092	0.635739	0.616402	1.32 × 10−25***	7.2 × 10−25***	0.157902	0.155169	0.158672	0.151042	0.0022**	0.0196*	0.275599	0.23339	0.26327	0.231183	1.8 × 10−67***	3.4 × 10−66***	0.135683	0.0960218	0.0271493	0.00404858	4.0 × 10−16***	3.18 × 10−15***	0.13648	0.121181
	All Generalists	All Specialists	Secreted	1796	2277	0.267322	0.22833	0.253544	0.220513	3.0 × 10−61***	2.1 × 10−60***	0.267408	0.230152	0.256485	0.224422	2.0 × 10−62***	1.4 × 10−61***	0.319422	0.281355	0.309832	0.276744	5.8 × 10−60***	3.5 × 10−59***	0.655892	0.627798	0.647108	0.627451	2.67 × 10−29***	1.6 × 10−28***	0.145494	0.147683	0.147122	0.144	0.907648	0.9934	0.300169	0.254551	0.27739	0.244444	1.2 × 10−61***	1.2 × 10−60***	0.155965	0.110328	0.0456031	0.0148148	1.74 × 10−20***	1.9 × 10−19***	0.141908	0.124559
	Legionella pneumophila	Legionella longbeachae	Cytoplasmic	1420	1504	0.239977	0.238001	0.237626	0.236146	0.156923	0.297613	0.256855	0.256392	0.255043	0.25487	0.594593	0.817566	0.309885	0.308626	0.307992	0.305986	0.328228	0.530957	0.639166	0.638261	0.640721	0.637992	0.334621	0.605655	0.150464	0.149043	0.148846	0.147826	0.318266	0.465159	0.239472	0.239206	0.237976	0.235487	0.15785	0.27265	0.041322	0.0406039	0.00861327	0.00923788	0.832821	0.942857	0.0659468	0.0653044
	Salmonella enterica typhimurium	Salmonella enterica typhi	Cytoplasmic	1841	1845	0.291861	0.291053	0.292683	0.291358	0.676095	0.808374	0.303137	0.302761	0.303125	0.303279	0.721472	0.867334	0.360444	0.359989	0.361607	0.361257	0.811428	0.907415	0.667807	0.66618	0.670659	0.670103	0.529377	0.74517	0.163773	0.164771	0.163136	0.164491	0.311415	0.465159	0.268722	0.268271	0.269118	0.267913	0.722156	0.807115	0.0483955	0.0501264	0.0167785	0.0165289	0.839531	0.942857	0.0744654	0.0771698
	Vibrio vulnificus	Vibrio cholerae	Cytoplasmic	1341	1543	0.282256	0.278637	0.279279	0.276527	0.0261*	0.0652596	0.300142	0.296508	0.298077	0.295082	0.0361*	0.0863151	0.357879	0.351228	0.357798	0.34981	9.76 × 10−5***	0.0003***	0.659628	0.656838	0.662198	0.658451	0.0198*	0.060388	0.15307	0.158372	0.152968	0.15736	3.2 × 10−6***	8.2 × 10−6***	0.257101	0.257467	0.254237	0.256927	0.502445	0.638969	0.0477942	0.0467087	0.017094	0.0150602	0.169142	0.465141	0.074906	0.073533
	Mycobacterium bovis	Mycobacterium leprae	Cytoplasmic	1363	730	0.364083	0.35552	0.364055	0.357765	0.0003***	0.0010 **	0.355443	0.350225	0.355072	0.352	0.0210*	0.0525594	0.421994	0.415049	0.422311	0.416885	0.0027**	0.0070**	0.722095	0.721101	0.725191	0.723241	0.852883	0.906156	0.167814	0.158375	0.165414	0.154762	1.1 × 10−12***	3.6 × 10−12***	0.317394	0.31159	0.319149	0.313928	0.0024**	0.0075**	0.0933341	0.0855525	0.0573441	0.0445677	0.0027*	0.0116*	0.101265	0.0971736
	Bartonella henselae	Bartonella quintana	Cytoplasmic	698	581	0.27129	0.276296	0.270385	0.273927	0.0654502	0.14399	0.28689	0.290399	0.285599	0.28972	0.159693	0.303659	0.341451	0.344549	0.341014	0.343384	0.218967	0.38849	0.655297	0.658721	0.656899	0.661932	0.16322	0.408049	0.160173	0.160083	0.158569	0.158242	0.861914	0.909798	0.258175	0.261044	0.257414	0.261128	0.285881	0.417826	0.057952	0.0600877	0.0164712	0.0181452	0.429282	0.778238	0.083491	0.083171
	Borrelia burgdoferi	Borrelia recurrentis	Cytoplasmic	333	418	0.208666	0.214421	0.209003	0.215078	0.173795	0.318625	0.228744	0.229687	0.224195	0.224121	0.846034	0.894844	0.283	0.28718	0.282328	0.289065	0.268288	0.447146	0.614696	0.618243	0.615882	0.618818	0.325146	0.605655	0.130607	0.132708	0.128458	0.130858	0.188257	0.357688	0.204248	0.204604	0.2	0.200313	0.673359	0.799614	0.025155	0.027631	0	0	0.703813	0.942857	0.0541095	0.0534159
	Chlamydia trachomatis	Chlamydia pneumoniae	Cytoplasmic	440	498	0.25507	0.242501	0.255555	0.241312	4.0 × 10−5***	0.0001**	0.279582	0.269162	0.282204	0.26822	0.0003***	0.0009***	0.329354	0.318395	0.335476	0.320773	0.0003***	0.0008***	0.661688	0.659092	0.665791	0.661985	0.298667	0.586667	0.154442	0.150538	0.151982	0.148081	0.0155*	0.0367*	0.256204	0.250156	0.255137	0.25	0.0095**	0.0257*	0.045633	0.048756	0.00752924	0.01041	0.399139	0.778238	0.0711708	0.0763798
	Rickettsia ricketsii	Rickettsia prowazekki	Cytoplasmic	460	443	0.231508	0.223327	0.229697	0.222222	0.0060**	0.0174*	0.250798	0.239964	0.250919	0.238217	0.0002***	0.0007***	0.303461	0.290692	0.303697	0.287918	2.0 × 10−5***	6.8 × 10−5***	0.638311	0.631486	0.641101	0.63253	0.0058**	0.0200*	0.130498	0.130255	0.127161	0.128035	0.995011	0.995011	0.232132	0.227386	0.232269	0.225197	0.0591061	0.140377	0.039712	0.0313539	0.00288223	0	0.0160*	0.0585962	0.0686266	0.0573311
	Citrobacter freundii	Citrobacter rodentium	Cytoplasmic	1980	1911	0.293638	0.296207	0.293291	0.295139	0.068606	0.145128	0.304416	0.308266	0.304299	0.308489	0.0025**	0.0069**	0.362301	0.36511	0.363184	0.366667	0.0170*	0.0407*	0.670101	0.669434	0.672833	0.673469	0.594326	0.764889	0.16217	0.162705	0.162221	0.162921	0.231821	0.400417	0.269657	0.272487	0.2696	0.271226	0.0829159	0.15754	0.0460354	0.0510054	0.018358	0.0201342	0.0432*	0.139889	0.0720872	0.0754953
	Salmonella enterica enteritidis	Salmonella enterica gallinarum	Cytoplasmic	1780	1683	0.293691	0.29368	0.293909	0.294118	0.809491	0.89044	0.304829	0.305135	0.304531	0.305085	0.659803	0.83055	0.362018	0.362286	0.363047	0.364162	0.699839	0.857309	0.668523	0.668977	0.670916	0.671968	0.517298	0.74517	0.163247	0.162834	0.162551	0.161963	0.566959	0.673264	0.270795	0.270288	0.269325	0.269939	0.871612	0.871612	0.0493885	0.0486287	0.0171087	0.0166667	0.840765	0.942857	0.0747156	0.0742925
	Streptococcus dysgalactiae	Streptococcus pyogenes	Cytoplasmic	433	508	0.274664	0.267836	0.277778	0.26782	0.0288*	0.0689129	0.287421	0.280898	0.288538	0.280205	0.0743524	0.170391	0.350263	0.343448	0.352113	0.345876	0.0510891	0.108073	0.659666	0.653997	0.664794	0.658757	0.0450145	0.130305	0.142324	0.14132	0.141322	0.138839	0.398082	0.540255	0.252545	0.247433	0.252033	0.247727	0.0824247	0.15754	0.0444859	0.0520838	0.0110803	0.0105175	0.852081	0.942857	0.0780579	0.082625
	Bacillus anthracis	Bacillus cereus	Cytoplasmic	1156	1246	0.247358	0.246107	0.244863	0.244681	0.565508	0.723324	0.289995	0.287211	0.288821	0.284464	0.160111	0.303659	0.34199	0.339443	0.342105	0.340984	0.268271	0.447146	0.642957	0.641604	0.645948	0.643855	0.413437	0.689062	0.145178	0.145878	0.144016	0.143865	0.618908	0.691721	0.227609	0.226429	0.22619	0.226027	0.504449	0.638969	0.0345807	0.0341655	0.00625992	0.0050978	0.44737	0.778238	0.0727567	0.0691505
	Mycobacterium avium	Mycobacterium intracellulare	Cytoplasmic	1769	2143	0.368709	0.366626	0.369384	0.367347	0.179851	0.319091	0.361078	0.359929	0.361111	0.361257	0.499296	0.722665	0.428706	0.428369	0.429091	0.428571	0.701435	0.857309	0.726454	0.727333	0.727513	0.72987	0.598004	0.764889	0.166934	0.166388	0.166065	0.164286	0.553151	0.673264	0.318725	0.318843	0.319392	0.320574	0.804266	0.848947	0.0941796	0.0933477	0.0628571	0.0639386	0.994042	0.994042	0.100584	0.101414
	Candida glabrata	Candida albicans	Cytoplasmic	3458	1378	0.230205	0.215777	0.226177	0.211738	7.44 × 10−20***	3.2 × 10−19***	0.238901	0.22418	0.23509	0.221009	2.4 × 10−18***	1.18 × 10−17***	0.301782	0.284953	0.299907	0.284112	1.7 × 10−19***	8.5 × 10−19***	0.633882	0.632109	0.634924	0.634536	0.294396	0.586667	0.14084	0.1311	0.13913	0.13	7.7 × 10−27***	2.93 × 10−26***	0.246141	0.243718	0.242181	0.240927	0.17776	0.281453	0.212018	0.201094	0.112676	0.0995348	0.225719	0.543052	0.193619	0.191311
	Babesia microti	Plasmodium falciparum	Cytoplasmic	980	3555	0.213195	0.157411	0.211159	0.151064	2.92 × 10−221***	5.4 × 10−220***	0.212547	0.167896	0.208765	0.160049	4.3 × 10−144***	4.7 × 10−143***	0.270836	0.230927	0.268795	0.22584	7.2 × 10−109***	6.6 × 10−108***	0.615188	0.52671	0.618809	0.521739	5 × 10−291***	1.4 × 10−289***	0.147384	0.125334	0.143625	0.12126	2.4 × 10−93***	4.5 × 10−92***	0.233068	0.157935	0.232895	0.150602	< 10−300***	< 10−300***	0.0914129	0.196934	0.0237719	0.129066	5.8 × 10−62***	1.6 × 10−50***	0.111238	0.161342
	Ascaris suum	Wuchereria bancrofti	Cytoplasmic	5884	14963	0.244667	0.224837	0.244444	0.223404	3.7 × 10−194***	5.1 × 10−193***	0.258827	0.235834	0.26	0.235294	4.82 × 10−238***	8.8 × 10−237***	0.313904	0.291998	0.316013	0.291866	7.1 × 10−186***	1.29 × 10−184***	0.637503	0.624419	0.640625	0.627319	1.2 × 10−65***	1.1 × 10−64***	0.170363	0.161515	0.167476	0.16	7.2 × 10−58***	6.7 × 10−57***	0.264075	0.24929	0.261647	0.24359	2.4 × 10−116***	1.1 × 10−115***	0.195312	0.179942	0.0983778	0.0454545	4.5 × 10−66***	2.5 × 10−64***	0.185608	0.197428
	All Generalist Prokaryotes	All Specialist Prokaryotes	Cytoplasmic	15014	15053	0.292507	0.288512	0.290215	0.286496	4.8 × 10−7***	1.9 × 10−6***	0.304272	0.301401	0.30384	0.301887	8.0 × 10−5***	2.9 × 10−4***	0.362523	0.358979	0.362106	0.358871	3.1 × 10−6***	1.19 × 10−5***	0.671603	0.669208	0.672566	0.670068	0.0002***	0.0007***	0.157778	0.157072	0.156662	0.155738	0.051723	0.109193	0.268557	0.266305	0.26738	0.26484	2.4 × 10−116***	1.4 × 10−4***	0.0553587	0.0545468	0.0199336	0.0184697	0.0653443	0.189155	0.0785901	0.0779811
	All Generalist Eukaryotes	All Specialist Eukaryotes	Cytoplasmic	10322	19896	0.236834	0.212162	0.236486	0.212517	< 10−300***	< 10−300***	0.247758	0.222888	0.248649	0.224599	< 10−300***	< 10−300***	0.305754	0.280598	0.30721	0.281586	2.65 × 10−301***	7.3 × 10−300***	0.634171	0.607493	0.636932	0.616344	1.2 × 10−248***	2.2 × 10−247***	0.158291	0.152943	0.15554	0.150327	8.4 × 10−40***	5.3 × 10−39***	0.255123	0.232581	0.252353	0.232258	3.7 × 10−5***	2.9 × 10−252***	0.191044	0.184443	0.093194	0.0657714	1.7 × 10−43***	2.3 × 10−42***	0.181231	0.190557
	All Generalists	All Specialists	Cytoplasmic	25336	34949	0.269826	0.245047	0.262981	0.24055	< 10−300***	< 10−300***	0.281248	0.256704	0.278351	0.255193	< 10−300***	< 10−300***	0.339395	0.314358	0.336626	0.312821	< 10−300***	< 10−300***	0.656353	0.634074	0.655022	0.64	1.4 × 10−295***	7.6 × 10−204***	0.157987	0.154721	0.156197	0.153135	2.3 × 10−35***	1.1 × 10−34***	0.263084	0.247106	0.260504	0.246883	3.1 × 10−253***	6.9 × 10−240***	0.110638	0.128495	0.03523	0.0330579	0.0023**	0.0105*	0.120407	0.142069
	Significant Mann-Whitney U test P-values and Q-values are represented with bold font and asterisks (*, < 0.05; **, < 0.01; ***, < 0.001).
	For each generalist vs. specialist pair of values, the highes value is represented in bold font.
[truncated: 4 more columns]
