# Supplementary material for: Proteins of generalist and specialist pathogens differ in their amino acid composition
Source: Life Sci Alliance. 2018 Jul 17;1(4):e201800017. doi: 10.26508/lsa.201800017 (PMC6238412; doi:10.26508/lsa.201800017)
Supplement: Supplementary file 2 [file LSA-2018-00017_TableS2.xlsx]

## Sheet: Table S2
	Table S2. Amino acid composition and intrinsic disorder of membrane proteins of generic and host-specific pathogens.
						AGDV						AGEV						AGVDE						AGEILPSTV						RExAA (RHMFW)						RPAA (ASTG)
	Generalist Pathogen Name	Specialist Pathogen Name	Location	Generalist Protein Count	Specialist Protein Count	Generalist Mean	Specialist Mean	Generalist Median	Specialist Median	P-value	Q-value	Generalist Mean	Specialist Mean	Generalist Median	Specialist Median	P-value	Q-value	Generalist Mean	Specialist Mean	Generalist Median	Specialist Median	P-value	Q-value	Generalist Mean	Specialist Mean	Generalist Median	Specialist Median	P-value	Q-value	Generalist Mean	Specialist Mean	Generalist Median	Specialist Median	P-value	Q-value	Generalist Mean	Specialist Mean	Generalist Median	Specialist Median	P-value	Q-value
	Legionella pneumophila	Legionella longbeachae	Membrane (extracellular domains)	686	691	0.23296	0.230577	0.230769	0.228296	0.597594	0.709643	0.234298	0.233727	0.232675	0.231884	0.856675	0.95746	0.28108	0.277676	0.284375	0.280822	0.322873	0.471891	0.639441	0.640959	0.642857	0.642857	0.81824	0.93891	0.155752	0.152566	0.149756	0.14433	0.334181	0.793679	0.267024	0.27043	0.257543	0.259669	0.430083	0.599673
	Salmonella enterica typhimurium	Salmonella enterica typhi	Membrane (extracellular domains)	1127	1063	0.281932	0.283339	0.283019	0.285054	0.705626	0.744828	0.278366	0.279525	0.280641	0.28125	0.683724	0.931095	0.330062	0.330899	0.333333	0.333333	0.926489	0.977961	0.664518	0.666622	0.666667	0.670807	0.345418	0.729216	0.170988	0.171592	0.162562	0.161972	0.877907	0.98119	0.29897	0.300008	0.293556	0.292731	0.884095	0.884095
	Vibrio vulnificus	Vibrio cholerae	Membrane (extracellular domains)	700	917	0.270759	0.267656	0.271623	0.271093	0.250632	0.424917	0.277126	0.276318	0.27932	0.277778	0.735075	0.931095	0.333024	0.326869	0.333333	0.328386	0.0445*	0.105728	0.66406	0.664267	0.666667	0.667904	0.913632	0.93891	0.157094	0.160357	0.149792	0.152632	0.186839	0.507134	0.28067	0.286438	0.277872	0.281734	0.309854	0.535202
	Mycobacterium bovis	Mycobacterium leprae	Membrane (extracellular domains)	625	333	0.35234	0.320201	0.356998	0.32381	8.0 × 10−12***	3.0 × 10−11***	0.3387	0.311073	0.337449	0.314199	3.2 × 10−8***	1.2 × 10−7***	0.392407	0.362464	0.398058	0.368421	1.8 × 10−9***	8.7 × 10−9***	0.72695	0.707304	0.73494	0.71537	1.5 × 10−5***	5.9 × 10−5***	0.162279	0.165943	0.157182	0.156306	1.1 × 10−7***	7.0 × 10−7***	0.353838	0.328815	0.343434	0.324841	4.5 × 10−6***	1.7 × 10−5**
	Bartonella henselae	Bartonella quintana	Membrane (extracellular domains)	318	283	0.245528	0.254669	0.250468	0.256098	0.287595	0.424917	0.249469	0.253374	0.257024	0.255319	0.734359	0.931095	0.297542	0.303743	0.307461	0.307692	0.557594	0.706286	0.647852	0.655514	0.657929	0.659574	0.529318	0.873411	0.166624	0.163685	0.160179	0.159533	0.991175	0.991175	0.277865	0.283474	0.272558	0.270588	0.677029	0.75668
	Borrelia burgdoferi	Borrelia recurrentis	Membrane (extracellular domains)	131	152	0.190827	0.19582	0.200514	0.202791	0.637979	0.713036	0.197241	0.196181	0.197266	0.2	0.968626	0.968626	0.247573	0.250409	0.254717	0.253957	0.680684	0.808312	0.604179	0.606273	0.610119	0.613822	0.842953	0.93891	0.143319	0.143468	0.135135	0.133244	0.688178	0.8908	0.22315	0.213354	0.217391	0.212342	0.49909	0.632181
	Chlamydia trachomatis	Chlamydia pneumoniae	Membrane (extracellular domains)	204	244	0.236885	0.229937	0.236887	0.228404	0.0946262	0.199766	0.248869	0.245056	0.252137	0.242345	0.104874	0.19926	0.287496	0.282531	0.295412	0.28326	0.0912057	0.157537	0.672851	0.680335	0.671966	0.666667	0.777847	0.93891	0.150757	0.135089	0.144202	0.136899	0.0249628	0.0921874	0.292112	0.291168	0.280165	0.274542	0.441865	0.599673
	Rickettsia ricketsii	Rickettsia prowazekki	Membrane (extracellular domains)	223	218	0.212832	0.201417	0.215415	0.207017	0.0772194	0.183396	0.212992	0.196621	0.216981	0.207222	0.0290678	0.0788982	0.26217	0.248666	0.273399	0.262801	0.0628741	0.132734	0.622971	0.610243	0.637931	0.624482	0.0257728	0.081614	0.150473	0.14528	0.135135	0.137378	0.987777	0.991175	0.249179	0.236639	0.245833	0.229246	0.0254*	0.0690174
	Citrobacter freundii	Citrobacter rodentium	Membrane (extracellular domains)	1258	1108	0.283551	0.286601	0.285714	0.286666	0.218655	0.415445	0.281053	0.285273	0.28273	0.288136	0.0380882	0.0804085	0.332467	0.335446	0.335092	0.338451	0.216229	0.342363	0.668478	0.667773	0.670344	0.671535	0.893897	0.93891	0.16521	0.167877	0.158759	0.158535	0.557472	0.882665	0.297456	0.302067	0.293098	0.297297	0.136888	0.260086
	Salmonella enterica enteritidis	Salmonella enterica gallinarum	Membrane (extracellular domains)	1061	976	0.285095	0.28574	0.285714	0.285391	0.944691	0.944691	0.283025	0.283651	0.281818	0.281793	0.931435	0.968626	0.333346	0.334138	0.334328	0.334335	0.986614	0.986614	0.666888	0.668173	0.667774	0.66959	0.612045	0.894527	0.167724	0.169064	0.160563	0.161721	0.703263	0.8908	0.300554	0.301257	0.294118	0.293406	0.766069	0.808628
	Streptococcus dysgalactiae	Streptococcus pyogenes	Membrane (extracellular domains)	237	220	0.246046	0.235088	0.254902	0.243578	0.0293*	0.0795771	0.24436	0.232457	0.252011	0.24054	0.0338282	0.0803421	0.297378	0.285203	0.313397	0.296296	0.0332*	0.0902252	0.647892	0.637868	0.655963	0.647442	0.130863	0.310799	0.151811	0.155081	0.140351	0.147395	0.494815	0.85468	0.271301	0.259393	0.269663	0.256736	0.0531302	0.126184
	Bacillus anthracis	Bacillus cereus	Membrane (extracellular domains)	749	760	0.242186	0.234852	0.240741	0.239674	0.295676	0.424917	0.257812	0.251408	0.262069	0.261065	0.523693	0.82918	0.304761	0.29836	0.314286	0.311652	0.419471	0.569282	0.634422	0.631547	0.647059	0.644105	0.523966	0.873411	0.160073	0.156952	0.145205	0.142857	0.751935	0.892922	0.260858	0.259027	0.253968	0.253446	0.596347	0.708162
	Mycobacterium avium	Mycobacterium intracellulare	Membrane (extracellular domains)	686	800	0.346235	0.341089	0.347826	0.343799	0.313097	0.424917	0.334295	0.331127	0.333333	0.333333	0.812693	0.95746	0.388585	0.385806	0.389793	0.391304	0.8389	0.937594	0.719469	0.718852	0.724862	0.726833	0.93891	0.93891	0.1719	0.171425	0.166667	0.164057	0.437872	0.838957	0.342695	0.33845	0.333686	0.333333	0.434872	0.599673
	Candida glabrata	Candida albicans	Membrane (extracellular domains)	714	310	0.220797	0.218968	0.222922	0.21892	0.555935	0.704185	0.221705	0.214074	0.222222	0.216999	0.152662	0.263689	0.277653	0.268195	0.28125	0.275562	0.0788193	0.149757	0.625226	0.621502	0.630585	0.629883	0.551628	0.873411	0.159285	0.154315	0.154739	0.145194	0.0085**	0.0406*	0.261106	0.273498	0.253707	0.259041	0.112012	0.236469
	Babesia microti	Plasmodium falciparum	Membrane (extracellular domains)	122	1158	0.201647	0.159158	0.202183	0.144444	5.8 × 10−21***	2.8 × 10−13***	0.192013	0.163603	0.197066	0.147185	7.8 × 10−9***	3.7 × 10−8***	0.253517	0.217403	0.259112	0.208712	1.0 × 10−8***	3.4 × 10−8***	0.606817	0.526106	0.619364	0.512302	6.8 × 10−21***	4.3 × 10−20***	0.163643	0.13846	0.147417	0.124101	1.1 × 10−7***	7.0 × 10−7***	0.232909	0.186397	0.230536	0.156633	1.6 × 10−7***	7.5 × 10−15***
	Ascaris suum	Wuchereria bancrofti	Membrane (extracellular domains)	1800	1941	0.231371	0.21289	0.233142	0.214286	2.82 × 10−21***	1.8 × 10−20***	0.237021	0.212447	0.239049	0.217184	9.0 × 10−31***	5.7 × 10−30***	0.290318	0.263835	0.294118	0.271975	1.2 × 10−27***	7.7 × 10−27***	0.626036	0.612491	0.631951	0.617647	1.4 × 10−8***	6.6 × 10−8***	0.180001	0.177298	0.174789	0.170732	0.0291*	0.0921874	0.264022	0.252456	0.260748	0.244048	1.0 × 10−15***	6.3 × 10−15***
	All Generalist Prokaryotes	All Specialist Prokaryotes	Membrane (extracellular domains)	8005	7765	0.277648	0.272241	0.277778	0.273913	0.0002***	0.0005***	0.277046	0.272998	0.278125	0.276094	0.0068**	0.0216*	0.327867	0.32288	0.333333	0.327869	0.0002***	0.0006***	0.666946	0.664559	0.668182	0.666667	0.05691	0.15447	0.163223	0.16284	0.155556	0.15486	0.612971	0.8908	0.294609	0.291903	0.288136	0.285714	0.0121*	0.0382*
	All Generalist Eukaryotes	All Specialist Eukaryotes	Membrane (extracellular domains)	2636	3409	0.227131	0.195191	0.228571	0.195402	4.3 × 10−75***	8.1 × 10−74***	0.230789	0.196003	0.232635	0.196429	3.2 × 10−81***	6.1 × 10−80***	0.285184	0.248459	0.288845	0.25	6.4 × 10−76***	1.2 × 10−74***	0.624927	0.583967	0.630769	0.59375	1.3 × 10−67***	2.4 × 10−6***	0.173633	0.162015	0.166667	0.15	8.7 × 10−28***	1.7 × 10−26***	0.261792	0.23193	0.257576	0.225	3.4 × 10−64***	6.5 × 10−63***
	All Generalists	All Specialists	Membrane (extracellular domains)	10641	11174	0.265134	0.248734	0.262136	0.25	1.6 × 10−37***	1.5 × 10−36***	0.265587	0.249508	0.265625	0.255542	1.7 × 10−35***	1.6 × 10−34***	0.317293	0.300176	0.320588	0.307692	1.4 × 10−39***	1.3 × 10−38***	0.656537	0.639972	0.660194	0.652401	1.2 × 10−27***	1.2 × 10−26***	0.165802	0.162588	0.158645	0.153846	3.3 × 10−10***	3.1 × 10−9***	0.28648	0.273606	0.278846	0.269321	5.6 × 10−30***	5.4 × 10−29***
	Legionella pneumophila	Legionella longbeachae	Membrane (transmembrane domains)	544	541	0.265138	0.270452	0.260957	0.262963	0.488705	0.773783	0.265909	0.271137	0.262398	0.263158	0.516169	0.826983	0.271275	0.2768	0.269321	0.272727	0.432391	0.746857	0.740807	0.745587	0.73913	0.745098	0.264239	0.722024	0.169861	0.168044	0.170056	0.165354	0.675454	0.864263	0.281701	0.285272	0.281074	0.286792	0.691047	0.905805
	Salmonella enterica typhimurium	Salmonella enterica typhi	Membrane (transmembrane domains)	863	809	0.327901	0.328418	0.32646	0.326923	0.808699	0.90384	0.328842	0.329116	0.326087	0.326087	0.869528	0.965579	0.333571	0.33401	0.333333	0.333333	0.84863	0.979292	0.761628	0.763605	0.763393	0.76378	0.620092	0.879073	0.166101	0.164928	0.164557	0.162996	0.630015	0.864263	0.30836	0.308285	0.30622	0.308696	0.858131	0.905805
	Vibrio vulnificus	Vibrio cholerae	Membrane (transmembrane domains)	526	679	0.318979	0.32007	0.316473	0.318841	0.916115	0.916115	0.32159	0.321301	0.321429	0.318966	0.905724	0.965579	0.326271	0.326586	0.325758	0.326087	0.979292	0.979292	0.760276	0.764369	0.760256	0.768116	0.266009	0.722024	0.16661	0.163713	0.165007	0.16	0.325062	0.864263	0.304456	0.30824	0.3061	0.311111	0.349597	0.738038
	Mycobacterium bovis	Mycobacterium leprae	Membrane (transmembrane domains)	429	243	0.423628	0.394645	0.418605	0.391304	3.8 × 10−6***	1.5 × 10−5***	0.424682	0.395387	0.422222	0.391635	1.4 × 10−6***	5.3 × 10−6***	0.42952	0.400522	0.427536	0.398305	2.7 × 10−6***	1.0 × 10−5***	0.81447	0.801716	0.816667	0.809211	0.0253*	0.0962348	0.133988	0.142831	0.130435	0.130435	0.0536138	0.864263	0.360533	0.340686	0.359848	0.347826	9.0 × 10−4***	3.5 × 10−3***
	Bartonella henselae	Bartonella quintana	Membrane (transmembrane domains)	236	210	0.278478	0.280378	0.274663	0.279344	0.782236	0.90384	0.280244	0.280738	0.279714	0.281096	0.939859	0.965579	0.284615	0.285274	0.282609	0.282698	0.918507	0.979292	0.735159	0.739268	0.739936	0.739818	0.723579	0.879073	0.185424	0.18338	0.178714	0.173913	0.560375	0.864263	0.285172	0.291453	0.296577	0.296699	0.794994	0.905805
	Borrelia burgdoferi	Borrelia recurrentis	Membrane (transmembrane domains)	99	121	0.206614	0.197108	0.205128	0.2	0.477005	0.773783	0.204937	0.196912	0.197279	0.201835	0.522305	0.826983	0.213453	0.204066	0.205128	0.208333	0.517473	0.759124	0.707624	0.710103	0.723214	0.725275	0.946528	0.9906	0.193222	0.190692	0.179487	0.184713	0.967731	0.9677	0.238713	0.241878	0.238806	0.23622	0.730952	0.905805
	Chlamydia trachomatis	Chlamydia pneumoniae	Membrane (transmembrane domains)	150	191	0.286251	0.280551	0.282508	0.27907	0.618418	0.78333	0.288144	0.282043	0.284983	0.278788	0.655948	0.830867	0.29235	0.285557	0.289855	0.284848	0.560041	0.759124	0.757754	0.766438	0.753234	0.76087	0.384602	0.786089	0.153344	0.148889	0.152174	0.152174	0.718193	0.864263	0.295984	0.290612	0.302776	0.286667	0.410547	0.780039
	Rickettsia ricketsii	Rickettsia prowazekki	Membrane (transmembrane domains)	172	177	0.240304	0.214522	0.240255	0.217391	0.0005***	0.0015**	0.241104	0.215182	0.238636	0.214815	0.0004***	0.0014**	0.247296	0.221649	0.246411	0.217391	3.8 × 10−4***	0.0012**	0.729365	0.721697	0.734397	0.72428	0.353615	0.786089	0.163786	0.165491	0.161905	0.161905	0.725348	0.864263	0.26206	0.250584	0.26087	0.253807	0.117971	0.373574
	Citrobacter freundii	Citrobacter rodentium	Membrane (transmembrane domains)	946	821	0.326208	0.328247	0.326087	0.332016	0.361916	0.753327	0.326944	0.32914	0.326673	0.331818	0.35218	0.743492	0.33196	0.334061	0.333333	0.336043	0.371122	0.709135	0.764401	0.766803	0.765465	0.768116	0.413731	0.786089	0.163785	0.162708	0.16198	0.161677	0.577675	0.864263	0.308387	0.309203	0.308617	0.313725	0.756953	0.905805
	Salmonella enterica enteritidis	Salmonella enterica gallinarum	Membrane (transmembrane domains)	810	755	0.328901	0.327939	0.326087	0.326087	0.882441	0.916115	0.329692	0.32913	0.326087	0.32636	0.965579	0.965579	0.334386	0.333773	0.333333	0.333333	0.963437	0.979292	0.762456	0.763739	0.764493	0.765217	0.776451	0.879073	0.164384	0.16459	0.162791	0.162791	0.920589	0.9677	0.310288	0.308271	0.309868	0.310127	0.758076	0.905805
	Streptococcus dysgalactiae	Streptococcus pyogenes	Membrane (transmembrane domains)	175	167	0.280006	0.276592	0.281481	0.276786	0.60401	0.78333	0.28247	0.279371	0.286957	0.282609	0.600956	0.830867	0.287516	0.283419	0.289855	0.285714	0.522103	0.759124	0.759159	0.758429	0.759494	0.753623	0.786539	0.879073	0.157524	0.159396	0.148438	0.15	0.679144	0.864263	0.284384	0.288157	0.29078	0.294118	0.817412	0.905805
	Bacillus anthracis	Bacillus cereus	Membrane (transmembrane domains)	603	604	0.270409	0.273897	0.272727	0.277778	0.396488	0.753327	0.271934	0.274803	0.272727	0.280502	0.408883	0.776877	0.276953	0.280738	0.279188	0.285074	0.373229	0.709135	0.742825	0.743465	0.745283	0.748268	0.761152	0.879073	0.171612	0.170365	0.168539	0.166667	0.691272	0.864263	0.276759	0.277645	0.282609	0.282609	0.968184	0.968185
	Mycobacterium avium	Mycobacterium intracellulare	Membrane (transmembrane domains)	496	575	0.432188	0.424728	0.429885	0.423237	0.0696584	0.165439	0.432084	0.425329	0.431104	0.42029	0.112608	0.267445	0.43734	0.43065	0.434783	0.428571	0.090312	0.214491	0.814977	0.813187	0.819887	0.818841	0.549532	0.879073	0.130998	0.132987	0.130435	0.128	0.454014	0.864263	0.362586	0.360456	0.360612	0.357143	0.669339	0.905805
	Candida glabrata	Candida albicans	Membrane (transmembrane domains)	694	301	0.264806	0.257635	0.26087	0.26087	0.543973	0.78333	0.265974	0.259299	0.26087	0.264925	0.655843	0.830867	0.271423	0.264502	0.263701	0.27037	0.599308	0.759124	0.709506	0.703452	0.706002	0.704348	0.763455	0.879073	0.176703	0.181013	0.174174	0.175373	0.541234	0.864263	0.266934	0.270877	0.264442	0.274336	0.275885	0.655226
	Babesia microti	Plasmodium falciparum	Membrane (transmembrane domains)	120	1150	0.204341	0.163925	0.2	0.146341	4.5 × 10−8***	2.1 × 10−7***	0.206467	0.163745	0.20368	0.146341	1.8 × 10−8***	8.4 × 10−8***	0.210271	0.169296	0.212784	0.152174	4.3 × 10−8***	2.1 × 10−7***	0.699529	0.663533	0.7	0.652174	6.1 × 10−6***	3.8 × 10−5***	0.175787	0.176594	0.171678	0.179631	0.366766	0.864263	0.248439	0.182536	0.245396	0.173913	1.9 × 10−17***	1.2 × 10−16***
	Ascaris suum	Wuchereria bancrofti	Membrane (transmembrane domains)	1794	1935	0.278069	0.248381	0.272091	0.25	7.4 × 10−27***	4.7 × 10−26***	0.279383	0.249041	0.275362	0.25	5.8 × 10−28***	3.7 × 10−27***	0.285107	0.255034	0.282609	0.259259	2.0 × 10−27***	1.3 × 10−26***	0.724487	0.715777	0.724248	0.717391	0.0014**	0.0066**	0.172097	0.171463	0.173913	0.173913	0.727847	0.864263	0.272467	0.260364	0.272727	0.26087	7.0 × 10−7***	3.3 × 10−6***
	All Generalist Prokaryotes	All Specialist Prokaryotes	Membrane (transmembrane domains)	6049	5893	0.322137	0.31774	0.318182	0.316038	0.0384*	0.104342	0.323189	0.318656	0.319218	0.317343	0.0320*	0.0867659	0.328177	0.323807	0.325758	0.322835	0.0377*	0.102431	0.763429	0.763567	0.764045	0.764045	0.9906	0.9906	0.161852	0.161778	0.15942	0.159292	0.912968	0.9677	0.30652	0.30474	0.304348	0.304348	0.184171	0.499892
	All Generalist Eukaryotes	All Specialist Eukaryotes	Membrane (transmembrane domains)	2608	3386	0.271147	0.22052	0.263158	0.219512	3.0 × 10−87***	5.6 × 10−86***	0.27246	0.220983	0.266055	0.221688	7.5 × 10−90***	1.4 × 10−87***	0.278022	0.226756	0.275255	0.230769	4.2 × 10−89***	7.9 × 10−88***	0.719352	0.696937	0.717391	0.695652	3.3 × 10−19***	6.3 × 10−18***	0.173493	0.174055	0.173913	0.173913	0.402343	0.864263	0.269889	0.234865	0.268657	0.23913	4.7 × 10−55***	9.0 × 10−54***
	All Generalists	All Specialists	Membrane (transmembrane domains)	8657	9279	0.306776	0.282264	0.304348	0.287879	1.5 × 10−45***	1.4 × 10−44***	0.307906	0.283014	0.304348	0.289474	1.3 × 10−46***	1.3 × 10−45***	0.313067	0.288392	0.306533	0.295455	2.5 × 10−46***	2.4 × 10−45***	0.75015	0.739253	0.75	0.745856	1.0 × 10−10***	9.8 × 10−10***	0.165359	0.166258	0.163265	0.164384	0.318598	0.864263	0.295485	0.279242	0.299107	0.285714	9.72 × 10−31***	9.23 × 10−30***
	Legionella pneumophila	Legionella longbeachae	Membrane (intracellular domains)	545	542	0.181017	0.180111	0.181818	0.179104	0.570837	0.713237	0.195003	0.191314	0.2	0.195557	0.416385	0.608563	0.231588	0.228955	0.239766	0.238673	0.525611	0.664963	0.547439	0.548224	0.571429	0.569703	0.964548	0.9645	0.202959	0.199704	0.186047	0.181818	0.409951	0.708182	0.228096	0.228469	0.230303	0.229233	0.96324	0.9632
	Salmonella enterica typhimurium	Salmonella enterica typhi	Membrane (intracellular domains)	866	812	0.234842	0.235666	0.241569	0.244444	0.596803	0.713237	0.237653	0.239128	0.25	0.25	0.548887	0.651804	0.281018	0.282069	0.291667	0.292893	0.559969	0.664963	0.573715	0.576698	0.59375	0.593407	0.716114	0.875788	0.233992	0.233985	0.213224	0.214286	0.866572	0.8666	0.255838	0.256906	0.260218	0.26087	0.721466	0.9632
	Vibrio vulnificus	Vibrio cholerae	Membrane (intracellular domains)	527	682	0.227315	0.218518	0.236559	0.228932	0.112762	0.267811	0.239388	0.231023	0.25	0.242924	0.107857	0.256161	0.28237	0.271723	0.296137	0.286702	0.0743329	0.176541	0.580058	0.576906	0.6	0.594271	0.650899	0.875788	0.198056	0.21147	0.179775	0.19218	0.00600772	0.0278667	0.251437	0.256088	0.252101	0.261722	0.151199	0.429129
	Mycobacterium bovis	Mycobacterium leprae	Membrane (intracellular domains)	431	243	0.305631	0.276207	0.31	0.287671	2.2 × 10−5***	8.35 × 10−5***	0.300171	0.27057	0.304965	0.275591	7.28 × 10−6***	2.77 × 10−5***	0.34783	0.316465	0.352941	0.326087	1.34 × 10−5***	5.11 × 10−5***	0.649217	0.632801	0.666667	0.657658	0.0311*	0.11818	0.241651	0.23913	0.22807	0.219512	0.283235	0.597867	0.315917	0.303209	0.317757	0.305556	0.0425*	0.1615
	Bartonella henselae	Bartonella quintana	Membrane (intracellular domains)	236	210	0.18893	0.182623	0.20489	0.2	0.678485	0.758306	0.200216	0.188238	0.21294	0.20831	0.246532	0.399539	0.238783	0.230109	0.258662	0.258708	0.613041	0.685163	0.540295	0.541291	0.562753	0.566727	0.606114	0.875788	0.222536	0.233297	0.201937	0.209302	0.748835	0.7904	0.227672	0.222389	0.239565	0.238095	0.532484	0.843125
	Borrelia burgdoferi	Borrelia recurrentis	Membrane (intracellular domains)	99	121	0.154809	0.146171	0.155172	0.15	0.339576	0.701362	0.16969	0.158065	0.173913	0.152174	0.18894	0.38338	0.207977	0.197057	0.204545	0.2	0.282714	0.537156	0.53118	0.531664	0.555556	0.538462	0.727722	0.875788	0.171193	0.172464	0.153846	0.166667	0.715001	0.7904	0.192233	0.190388	0.191176	0.198473	0.846363	0.9632
	Chlamydia trachomatis	Chlamydia pneumoniae	Membrane (intracellular domains)	150	191	0.188229	0.191446	0.198138	0.185185	0.770565	0.813375	0.205251	0.20248	0.206389	0.201493	0.482182	0.651804	0.235244	0.240872	0.250874	0.244898	0.931647	0.931647	0.574526	0.576526	0.602273	0.585586	0.441475	0.875788	0.201895	0.187572	0.181038	0.171429	0.0809354	0.213987	0.255437	0.249607	0.253984	0.24183	0.251335	0.530522
	Rickettsia ricketsii	Rickettsia prowazekki	Membrane (intracellular domains)	172	177	0.163648	0.153984	0.158911	0.162162	0.372611	0.701362	0.169868	0.157885	0.170133	0.159292	0.25234	0.399539	0.210929	0.199479	0.216905	0.2	0.262834	0.537156	0.540845	0.537998	0.549483	0.550725	0.88146	0.930472	0.170808	0.169053	0.157379	0.156863	0.741757	0.7904	0.209333	0.197	0.213468	0.207547	0.158068	0.429129
	Citrobacter freundii	Citrobacter rodentium	Membrane (intracellular domains)	950	824	0.237613	0.239613	0.244381	0.246028	0.600621	0.713237	0.244104	0.245261	0.25	0.252699	0.61839	0.691142	0.286538	0.288185	0.294804	0.297791	0.520605	0.664963	0.584457	0.580834	0.6	0.6	0.783571	0.875788	0.222245	0.229874	0.207052	0.215535	0.0901288	0.213987	0.262387	0.260517	0.267579	0.268475	0.948315	0.9632
	Salmonella enterica enteritidis	Salmonella enterica gallinarum	Membrane (intracellular domains)	812	757	0.233922	0.236603	0.241379	0.243446	0.495472	0.713237	0.23732	0.239558	0.25	0.25	0.542755	0.651804	0.280231	0.28312	0.290199	0.292308	0.49164	0.664963	0.574885	0.577445	0.595238	0.598214	0.560459	0.875788	0.232046	0.23004	0.212549	0.209677	0.575808	0.781443	0.258498	0.257763	0.261008	0.261538	0.91833	0.9632
	Streptococcus dysgalactiae	Streptococcus pyogenes	Membrane (intracellular domains)	177	168	0.20133	0.196572	0.198925	0.19316	0.512433	0.713237	0.209173	0.207121	0.214286	0.212912	0.764397	0.806864	0.252427	0.247015	0.261538	0.252255	0.535305	0.664963	0.556858	0.562938	0.574468	0.579474	0.645059	0.875788	0.185604	0.178013	0.172414	0.167768	0.329429	0.62586	0.235378	0.246041	0.244186	0.248016	0.412672	0.78413
	Bacillus anthracis	Bacillus cereus	Membrane (intracellular domains)	610	605	0.187685	0.195489	0.190476	0.196581	0.406052	0.701362	0.213431	0.223359	0.218899	0.227545	0.201779	0.38338	0.252211	0.260428	0.26087	0.265625	0.405729	0.664963	0.534604	0.541274	0.552806	0.558824	0.240324	0.76095	0.190729	0.190397	0.173034	0.176471	0.745039	0.7904	0.213432	0.215033	0.220639	0.21978	0.793204	0.9632
	Mycobacterium avium	Mycobacterium intracellulare	Membrane (intracellular domains)	497	576	0.311351	0.311022	0.313725	0.317073	0.986917	0.986917	0.303863	0.304028	0.310078	0.3125	0.961473	0.961473	0.353767	0.355764	0.363636	0.363636	0.811294	0.856366	0.652343	0.656987	0.666667	0.669122	0.765074	0.875788	0.24252	0.235801	0.225	0.22265	0.451728	0.715192	0.319225	0.318297	0.315789	0.321936	0.794712	0.9632
	Candida glabrata	Candida albicans	Membrane (intracellular domains)	694	301	0.210754	0.194385	0.20893	0.195652	0.0010**	0.0032**	0.216027	0.202354	0.215214	0.2	0.0077**	0.0245*	0.271797	0.254611	0.273946	0.259259	0.0022**	0.0069**	0.590909	0.591434	0.600248	0.604938	0.623758	0.875788	0.176737	0.163128	0.16294	0.152542	0.0009***	0.0057**	0.243624	0.24681	0.244292	0.246575	0.5252	0.843125
	Babesia microti	Plasmodium falciparum	Membrane (intracellular domains)	120	1150	0.180302	0.115313	0.181818	0.116575	3.6 × 10−23***	1.7 × 10−22***	0.171921	0.128387	0.181818	0.125	1.6 × 10−13***	7.54 × 10−13***	0.221376	0.1757	0.234455	0.180335	2.5 × 10−11***	1.2 × 10−10***	0.568044	0.454232	0.578564	0.470162	1.8 × 10−27***	1.16 × 10−26***	0.183441	0.156185	0.166667	0.143876	0.0087**	0.0279*	0.247115	0.137594	0.242359	0.139535	6.7 × 10−35***	4.3 × 10−34***
	Ascaris suum	Wuchereria bancrofti	Membrane (intracellular domains)	1794	1936	0.214803	0.189823	0.218218	0.191176	5.5 × 10−31***	3.5 × 10−30***	0.225217	0.19661	0.229358	0.202467	4.7 × 10−35***	3.0 × 10−34***	0.273657	0.241964	0.278281	0.25	3.93 × 10−31***	2.49 × 10−30***	0.591831	0.567813	0.604248	0.582235	3.4 × 10−15***	1.6 × 10−14***	0.201318	0.197957	0.191281	0.1875	0.0088**	0.0279*	0.257327	0.237116	0.258621	0.234941	1.1 × 10−24***	5.0 × 10−24***
	All Generalist Prokaryotes	All Specialist Prokaryotes	Membrane (intracellular domains)	6072	5908	0.228983	0.225454	0.233819	0.22973	0.0218*	0.0591517	0.23625	0.232724	0.244186	0.240506	0.0278*	0.0755318	0.278478	0.274982	0.285714	0.283784	0.0480*	0.130417	0.578215	0.577553	0.595745	0.594595	0.621848	0.875788	0.217422	0.216765	0.2	0.2	0.555117	0.781443	0.255484	0.253489	0.258389	0.256637	0.19981	0.474525
	All Generalist Eukaryotes	All Specialist Eukaryotes	Membrane (intracellular domains)	2608	3387	0.212138	0.16493	0.214286	0.166667	3.3 × 10−131***	6.33 × 10−130***	0.220319	0.173957	0.222222	0.173913	4.9 × 10−125***	9.3 × 10−124***	0.270757	0.220589	0.275121	0.225352	4.3 × 10−112***	8.2 × 10−111***	0.590491	0.531348	0.60181	0.545455	3.77 × 10−99***	7.2 × 10−98***	0.193954	0.180679	0.18327	0.168142	1.8 × 10−20***	3.4 × 10−20***	0.253211	0.204187	0.254054	0.206897	3.7 × 10−120***	7.1 × 10−119***
	All Generalists	All Specialists	Membrane (intracellular domains)	8680	9295	0.223922	0.203399	0.225641	0.204545	8.73 × 10−56***	8.3 × 10−55***	0.231463	0.21131	0.235294	0.215909	4.3 × 10−54***	4.1 × 10−53***	0.276158	0.255162	0.281983	0.262295	5.2 × 10−49***	4.9 × 10−48***	0.581904	0.560716	0.599213	0.579365	3.0 × 10−37***	2.9 × 10−36***	0.210371	0.203616	0.194444	0.188235	2.0 × 10−11***	1.9 × 10−10***	0.254801	0.235524	0.257143	0.24	5.3 × 10−51***	5.0 × 10−50***
	Significant Mann-Whitney U test P-values and Q-values are represented with bold font and asterisks (*, < 0.05; **, < 0.01; ***, < 0.001).
	For each generalist vs. specialist pair of values, the highes value is represented in bold font.
