# Supplementary material for: Proteins of generalist and specialist pathogens differ in their amino acid composition
Source: Life Sci Alliance. 2018 Jul 17;1(4):e201800017. doi: 10.26508/lsa.201800017 (PMC6238412; doi:10.26508/lsa.201800017)
Supplement: Supplementary file 4 [file LSA-2018-00017_TableS4.xlsx]

## Sheet: Table S4
	Table S4. Spearman correlations between GC3 and the ratio of primitive amino acids and intrinsic disorder, among secreted proteins.
		AGVDE			Disorder short			Disorder long
	Species	ρ	P-value	Q-value	ρ	P-value	Q-value	ρ	P-value	Q-value
	Legionella longbeachae	-0.068968	5.7 × 10−5 ***	7.7 × 10−5***	-0.0748757	1.2 × 10−5***	1.7 × 10−5***	-0.0499097	0.0036**	0.0062**
	Legionella pneumophila	-0.0340267	0.0649392	0.0747784	-0.0851242	3.8 × 10−6***	5.7 × 10−6***	-0.0417174	0.0236*	0.0374*
	Salmonella enterica typhi	0.18376	1.5 × 10−32***	5.3 × 10−32***	-0.188011	5.2 × 10−34***	1.6 × 10−33***	-0.0135094	0.38657	0.459052
	Salmonella enterica typhimurium	0.218621	3.0 × 10−49***	1.1 × 10−48***	-0.179587	1.5 × 10−33***	4.5 × 10−33***	0.01638	0.274851	0.348145
	Vibrio cholerae	0.008068	0.633064	0.668234	-0.228265	1.2 × 10−42***	4.5 × 10−42***	-0.0576111	6.0 × 10−3***	0.0014**
	Vibrio vulnificus	-0.13244	5.4 × 10−12***	8.9 × 10−12***	-0.202139	3.4 × 10−26***	9.1 × 10−26***	-0.0629933	0.0011**	0.0022**
	Mycobacterium leprae	0.0293904	0.239427	0.25995	-0.119718	1.6 × 10−6***	2.6 × 10−6***	-0.0147794	0.554194	0.619394
	Mycobacterium bovis	0.131836	7.5 × 10−17***	1.5 × 10−16***	-0.252639	7.9 × 10−59***	5.8 × 10−58***	-0.112504	1.2 × 10−12***	5.0 × 10−12***
	Bartonella quintana	-0.220091	9.6 × 10−15***	1.8 × 10−14***	0.160977	1.8 × 10−8***	3.5 × 10−8***	0.0721905	0.0120*	0.0198*
	Bartonella henselae	-0.196923	1.0 × 10−14***	3.4 × 10−14***	0.162913	2.7 × 10−10***	5.6 × 10−10***	0.0244157	0.346941	0.425282
	Borrelia recurrentis	0.047155	0.180549	0.20179	0.163375	3.6 × 10−6***	4.8 × 10−6***	0.0438762	0.212814	0.27886
	Borrelia burgdoferi	0.129893	0.0002***	3.0 × 10−3***	0.17734	4.7 × 10−7***	8.9 × 10−7***	0.142399	5.5 × 10−5***	0.0001***
	Chlamydia pneumoniae	-0.268818	1.7 × 10−18***	3.8 × 10−18***	-0.19667	2.0 × 10−10***	4.4 × 10−10***	-0.133884	1.6 × 10−5***	4.8 × 10−5***
	Chlamydia trachomatis	-0.129252	0.0001***	0.0001***	-0.0563838	0.0933043	0.114373	-0.047197	0.160186	0.234118
	Rickettsia prowazekki	0.0673036	0.0507674	0.0602863	0.000765173	0.982302	0.99161	-0.0250949	0.466828	0.53756
	Rickettsia ricketsii	0.0849652	0.0027**	0.0033**	0.00119359	0.966427	0.99161	-0.0154552	0.585729	0.635935
	Citrobacter rodentium	0.170511	6.1 × 10−32***	1.92 × 10−31***	-0.287715	3.1 × 10−90***	3.0 × 10−89***	-0.0505245	0.0005***	0.0013**
	Citrobacter freundii	0.0857864	5.2 × 10−9***	8.3 × 10−9***	-0.248127	9.3 × 10−66***	7.0 × 10−65***	-0.0505272	0.0006***	0.0013**
	Salmonella enterica gallinarum	0.269806	5.7 × 10−72***	2.7 × 10−71***	-0.221094	2.5 × 10−48***	1.2 × 10−47***	0.0221738	0.147848	0.224729
	Salmonella enterica enteritidis	0.284604	1.7 × 10−84***	9.2 × 10−84***	-0.221798	3.3 × 10−51***	1.8 × 10−50***	0.0200024	0.180029	0.253374
	Streptococcus pyogenes	-0.000153841	0.994662	0.994662	-0.054722	0.0172*	0.0218*	-0.0297588	0.19548	0.265294
	Streptococcus dysgalactiae	-0.19915	2.3 × 10−18***	4.9 × 10−18***	-0.170287	9.2 × 10−14***	2.3 × 10−13***	-0.162825	1.1 × 10−12***	5.0 × 10−12***
	Bacillus cereus	-0.15342	5.0 × 10−29***	1.5 × 10−28***	-0.00149856	0.913539	0.99161	-0.0425615	0.0020**	0.0037**
	Bacillus anthracis	-0.154534	1.2 × 10−28***	3.2 × 10−28***	-0.0480276	0.0006***	0.0008***	-0.110017	3.2 × 10−15***	1.7 × 10−14***
	Mycobacterium intracellulare	0.137255	2.0 × 10−22***	5.1 × 10−22***	-0.19374	2.0 × 10−42***	8.6 × 10−42***	-0.0789527	2.3 × 10−8***	8.0 × 10−8***
	Mycobacterium avium	0.112052	2.3 × 10−13***	4.0 × 10−13***	-0.202322	1.6 × 10−40***	5.5 × 10−40***	-0.105323	5.8 × 10−12***	2.2 × 10−11***
	Wuchereria bancrofti	0.0374998	3.9 × 10−7***	5.9 × 10−7***	0.00808565	0.273868	0.322976	-0.00354223	0.63169	0.666784
	Ascaris suum	0.164494	1.2 × 10−6***	1.7 × 10−6***	0.000358258	0.99161	0.99161	-0.0129761	0.703291	0.722299
	Plasmodium falciparum	0.0928117	1.3 × 10−6***	1.8 × 10−6***	-0.0758304	7.6 × 10−5***	0.0001***	-0.164057	7.6 × 10−18***	4.8 × 10−17***
	Babesia microti	0.250763	1.3 × 10−18***	3.0 × 10−18***	0.198024	4.8 × 10−12***	1.1 × 10−11***	0.118036	4.2 × 10−5***	0.0001***
	Candida albicans	0.00981569	0.682681	0.701132	-0.111899	2.9 × 10−6***	4.8 × 10−6***	-0.11043	4.0 × 10−6***	1.3 × 10−5***
	Candida glabrata	0.23278	2.2 × 10−54***	9.4 × 10−54***	0.0164029	0.280479	0.322976	-0.0479461	0.0016**	0.0030**
	Prokaryote Specialists	0.530053	< 10−300***	< 10−300***	0.182191	5.0 × 10−278***	9.5 × 10−277***	0.270243	< 10−300***	< 10−300***
	Prokaryote Generalists	0.547353	< 10−300***	< 10−300***	0.179413	3.4 × 10−278***	9.5 × 10−277***	0.29483	< 10−300***	< 10−300***
	Eukaryote Specialists	0.190737	1.7 × 10−185***	1.3 × 10−184***	0.00277947	0.674936	0.75434	-0.0776926	7.9 × 10−32***	6.0 × 10−31***
	Eukaryote Generalists	0.294226	7.8 × 10−128***	4.9 × 10−127***	0.0611488	1.0 × 10−6***	1.8 × 10−6***	0.000961127	0.938761	0.938761
	All Specialists	0.514626	< 10−300***	< 10−300***	-0.0183568	6.5 × 10−6***	9.4 × 10−6***	0.0552237	5.4 × 10−42***	5.0 × 10−41***
	All Generalists	0.529729	< 10−300***	< 10−300***	0.137958	5.8 × 10−191***	7.4 × 10−190***	0.227725	< 10−300***	< 10−300***
	Significant P-values and Q-values are represented with bold font and asterisks (*, < 0.05; **, < 0.01; ***, < 0.001).
