# Supplementary material for: Proteins of generalist and specialist pathogens differ in their amino acid composition
Source: Life Sci Alliance. 2018 Jul 17;1(4):e201800017. doi: 10.26508/lsa.201800017 (PMC6238412; doi:10.26508/lsa.201800017)
Supplement: Supplementary file 6 [file LSA-2018-00017_TableS6.xlsx]

## Sheet: Table S6
	Table S6. ANCOVA analyses of secreted proteins using long stretches of intrinsically disordered regions.
			Host range			GC3			Percentage Disorder (Long)			Host range × GC3			Disorder (Long) × GC3			Host range × Disorder (Long)			Host range × Disorder (Long) × GC3
	Generalist Species	Specialist Species	F	P-value	Q-value	F	P-value	Q-value	F	P-value	Q-value	F	P-value	Q-value	F	P-value	Q-value	F	P-value	Q-value	F	P-value	Q-value
	Legionella pneumophila	Legionella longbeachae	2.07946	0.153197	0.536189	1.00677	0.318702	0.70742	3.11101	0.0815826	0.536189	0.703107	0.40424	0.70742	0.0186762	0.891642	0.891642	0.400838	0.528463	0.739848	0.0388484	0.844249	0.891642
	Salmonella enterica typhimurium	Salmonella enterica typhi	0.457182	0.500245	0.700343	9.34554	0.0030**	0.0193*	0.539107	0.464235	0.700343	0.00239324	0.961064	0.961064	7.70227	0.00639922	0.0224*	0.457472	0.50011	0.700343	0.221065	0.639083	0.745597
	Vibrio vulnificus	Vibrio cholerae	1.08025	0.302677	0.529685	5.46341	0.0227*	0.079318	7.17784	0.009**	0.0660732	0.720777	0.399155	0.558818	0.00836816	0.927408	0.990965	1.41987	0.237966	0.529685	0.00012926	0.990965	0.990965
	Mycobacterium bovis	Mycobacterium leprae	1.94377	0.167733	0.234826	49.2275	1.2 × 10−9***	8.7 × 10−9***	41.47	1.4 × 10−8***	4.8 × 10−8***	0.710803	0.402091	0.469106	4.40651	0.0395*	0.0920794	3.52597	0.0646413	0.113122	3.9 × 10−5	0.995045	0.995045
	Bartonella henselae	Bartonella quintana	0.495433	0.554426	0.962852	2.16735	0.278835	0.962852	0.0155237	0.912238	0.962852	0.278131	0.65059	0.962852	1.09724	0.404799	0.962852	0.00276371	0.962852	0.962852	−	−	−
	Borrelia burgdoferi	Borrelia recurrentis	0.299302	0.62239	0.925402	0.0103453	0.925402	0.925402	1.72043	0.280985	0.925402	0.0720583	0.805764	0.925402	0.197291	0.687003	0.925402	0.248997	0.652077	0.925402	−	−	−
	Chlamydia trachomatis	Chlamydia pneumoniae	1.06904	0.309709	0.665337	0.794116	0.380193	0.665337	0.00170877	0.96731	0.96731	4.12967	0.0513868	0.359708	0.282962	0.598818	0.698621	0.479189	0.494296	0.692014	2.39347	0.132687	0.464406
	Rickettsia ricketsii	Rickettsia prowazekki	1.26604	0.377394	0.579077	4.41159	0.170503	0.579077	0.485959	0.557867	0.597207	0.387324	0.597207	0.597207	1.04801	0.413627	0.579077	1.13946	0.397548	0.579077	1.36488	0.363113	0.579077
	Citrobacter freundii	Citrobacter rodentium	0.653727	0.420964	0.589349	5.24025	0.0245*	0.171246	2.59032	0.1111	0.38885	0.140256	0.708928	0.827082	1.63683	0.204124	0.476289	0.854899	0.357699	0.589349	0.00773858	0.930101	0.930101
	Salmonella enterica enteritidis	Salmonella enterica gallinarum	0.0969537	0.756146	0.921608	4.1816	0.0434*	0.151953	2.44053	0.121303	0.283041	0.0478426	0.827293	0.921608	6.957	0.001**	0.0675006	0.00973189	0.921608	0.921608	0.0488211	0.825565	0.921608
	Streptococcus dysgalactiae	Streptococcus pyogenes	5.61721	0.0339318	0.0791742	3.61868	0.0795204	0.139161	20.8077	5.0 × 10−4***	0.004**	8.28762	0.0129*	0.0452*	2.48864	0.138685	0.194159	0.398899	0.538606	0.538606	1.27469	0.279292	0.325841
	Bacillus anthracis	Bacillus cereus	0.188984	0.664656	0.780991	0.856735	0.356777	0.780991	0.18331	0.669421	0.780991	1.99e-06	0.998876	0.998876	0.21175	0.646351	0.780991	1.26492	0.263287	0.780991	3.4495	0.0660733	0.462513
	Mycobacterium avium	Mycobacterium intracellulare	1.06353	0.305085	0.6468	1.76803	0.186878	0.6468	3.94315	0.0500074	0.350051	0.555418	0.457992	0.6468	0.545554	0.462	0.6468	0.0770938	0.781891	0.781891	0.244534	0.622117	0.725803
	Candida glabrata	Candida albicans	0.0901661	0.764269	0.891647	11.687	0.000758517	0.005**	6.26163	0.0131*	0.046*	3.12052	0.0787929	0.137888	4.75811	0.030*	0.0706828	1.4881	0.223906	0.313469	0.0103288	0.919149	0.919149
	Babesia microti	Plasmodium falciparum	13.5157	2.8 × 10−3***	0.0007***	40.6775	6.6 × 10−10***	2.3 × 10−9***	115.86	3.8 × 10−23***	2.7 × 10−22***	0.795931	0.373009	0.522213	0.000642463	0.979795	0.979795	0.0053514	0.941732	0.979795	8.79182	0.0033*	0.0057**
	Ascaris suum	Wuchereria bancrofti	19.1542	1.3 × 10−5***	4.5 × 10−6***	4.02683	0.0450*	0.104922	178.167	2.0 × 10−38***	1.4 × 10−37***	0.000653159	0.979614	0.979614	0.0931226	0.760288	0.887003	1.90755	0.167447	0.293032	0.294842	0.587217	0.822104
	All Generalist Prokaryotes	All Specialist Prokaryotes	21.3072	4.5 × 10−6***	5.3 × 10−5***	442.894	1.1 × 10−79***	7.7 × 10−79***	37.4724	1.4 × 10−9***	4.9 × 10−9***	21.4979	4.1 × 10−6***	5.3 × 10−6***	25.4026	5.7 × 10−7***	9.9 × 10−7***	20.8966	5.6 × 10−6***	5.6 × 10−6***	25.5154	5.4 × 10−7***	9.9 × 10−7***
	All Generalist Eukaryotes	All Specialist Eukaryotes	12.4919	4.2 × 10−4***	9.8 × 10−4***	90.4816	5.2 × 10−21***	1.8 × 10−20***	258.088	1.1 × 10−54***	7.5 × 10−54***	0.686597	0.407424	0.438177	0.601295	0.438177	0.438177	0.667956	0.413863	0.438177	10.3562	0.001**	0.0023**
	All Generalists	All Specialists	68.3727	2.1 × 10−16***	4.8 × 10−16***	1304.66	1.2 × 10−235***	8.2 × 10−235***	324.381	8.9 × 10−69***	3.1 × 10−68***	10.9068	0.0010**	0.0014**	6.0598	0.0139*	0.0162*	0.195238	0.658626	0.658626	38.5456	6.1 × 10−10***	1.8 × 10−9***
	Significant factors and interactions are represented with bold font and asterisks (*, < 0.05; **, < 0.01; ***, < 0.001).
